# Supplementary material
Source: PubMed Central journal article supplement (PMC5559321)
Supplement: NIHMS885591-supplement-3.pdf [file NIHMS885591-supplement-3.pdf]

**Table 1 – QPCR primer list**

| Primer         | Forward                        | Reverse                           |
|----------------|--------------------------------|-----------------------------------|
| Oct4           | 5'- CTTGAATCCCGAATGGAAAGGG -3' | 5'- GTGTATATCCCAGGGTGATCCTC -3'   |
| Sox2           | 5'- GCCGAGTGGAAACTTTTGTCG -3'  | 5'- GGCAGCGTGTACTIONTATCCTTCT -3' |
| Nanog          | 5'- TTTGTGGGCCTGAAGAAAAC -3'   | 5'- AGGGCTGTCCTGAATAAGCAG -3'     |
| SRC-1          | 5'- AATGAATACGAGCGTCTACAGC-3'  | 5'- TTTCGTCGTGTTGCCTCTTGA-3'      |
| SRC-2          | 5'- TGGGGCCTATGATGCTTGAG-3'    | 5'- GGTTTTTGACAAATTCCGTGTGG-3'    |
| SRC-3          | 5'- AGACGGGAGCAGGAAAGTAAA-3'   | 5'- GTAAAAGCGGTCCTAAGGAGTC-3'     |
| Snail          | 5'- GCTGCAGGACTCTAATCCAGA -3'  | 5'- ATCTCCGGAGGTGGGATG -3'        |
| Slug           | 5'- TGGTTGCTTCAAGGACACAT -3'   | 5'- GCAAATGCTCTGTTGCAGTG -3'      |
| E-cadherin     | 5'- TGGAGGAATTCTTGCTTTGC -3'   | 5'- CGCTCTCCTCCGAAGAAAC -3'       |
| GAPDH          | 5'- GGAGCGAGATCCCTCCAAAAT-3'   | 5'- GGCTGTTGTCATACTTCTCATGG-3'    |
| $\beta$ -actin | 5'- CCAACCGCGAGAAGATGA -3'     | 5'- CCAGAGGCGTACAGGGATAG -3'      |
