# Supplementary material
Source: PubMed Central journal article supplement (PMC5559321)
Supplement: NIHMS885591-supplement-4.pdf [file NIHMS885591-supplement-4.pdf]

**Table 2 – ChIP-qPCR primer list**

| Primer  | Forward                     | Reverse                    |
|---------|-----------------------------|----------------------------|
| Snail   | 5'-CGCTCCGTAAACACTGGATAA-3' | 5'-GAAGCGAGGAAAGGGACAC-3'  |
| Slug    | 5'-GCCTGCCTTTAGAGGGCTAC-3'  | 5'-TGCGCTACTCAGGGCTTC-3'   |
| Control | 5'-AGCTCAGGCCTCAAGACCTT-3'  | 5'-AAGAAGATGCGGCTGACTGT-3' |
